# Supplementary material for: Preoperative endoscopic versus percutaneous transhepatic biliary drainage in potentially resectable perihilar cholangiocarcinoma (DRAINAGE trial): design and rationale of a randomized controlled trial
Source: PubMed Central journal article supplement (PMC4332425; doi:10.1186/s12876-015-0251-0), 2015-02-14
Supplement: 12876_2015_251_MOESM1_ESM.pdf [file 12876_2015_251_MOESM1_ESM.pdf]

## **Profylactic antibiotics protocol among participating centers in DRAINAGE trial**

| <b>Hospital site no.</b> | <b>Procedural profylactic antibiotics protocol</b> |
|--------------------------|----------------------------------------------------|
| 1                        | 2000 mg ceftriaxone + 5 mg/kg gentamycin           |
| 2                        | 2000 mg ceftriaxone                                |
| 3                        | 1200 mg Augmentin                                  |
| 4                        | 1200 mg Augmentin                                  |
| 5                        | 1200 mg Augmentin                                  |
