# Supplementary material for: Preoperative endoscopic versus percutaneous transhepatic biliary drainage in potentially resectable perihilar cholangiocarcinoma (DRAINAGE trial): design and rationale of a randomized controlled trial
Source: PubMed Central journal article supplement (PMC4332425; doi:10.1186/s12876-015-0251-0), 2015-02-14
Supplement: 12876_2015_251_MOESM2_ESM.pdf [file 12876_2015_251_MOESM2_ESM.pdf]

**Drainage**  
front page

Protocol version: 3.0 Feb 2014  
CRF version: 2.0 Jun 2014

Page 1 of 1

Please return within one month after registration to: Antoni van Leeuwenhoek datacenter, Post Box 90203, 1006 BE Amsterdam

Patient study number

Patient verification code

(mmyyyy of birth date patient)

Institute

Physician's name

**Principle investigator**

Dr. T. M. van Gulik, M.D, PhD.  
Surgeon  
Department of surgery  
AMC, Amsterdam  
Meibergdreef 9,  
1105 AZ Amsterdam  
The Netherlands  
Tel.: +31-20-566 5572, sein 81 62571  
E-mail: [t.m.vangulik@amc.nl](mailto:t.m.vangulik@amc.nl)

**Co-investigator**

Dr. J. K. Wiggers, MD  
Department of surgery  
AMC, Amsterdam  
Meibergdreef 9  
1105 AZ Amsterdam  
The Netherlands  
Tel.: +31-20-566 5568, sein 81 65573  
E-mail: [j.k.wiggers@amc.nl](mailto:j.k.wiggers@amc.nl)

**Co-investigator**

Drs. R.J.S. Coelen, MD  
Department of surgery  
AMC, Amsterdam  
Meibergdreef 9  
1105 AZ Amsterdam  
The Netherlands  
Tel.: +31-20-566 3995, sein 81 65573  
E-mail: [r.j.coelen@amc.nl](mailto:r.j.coelen@amc.nl)

**Datacenter:**

Biometrics Department NKI-AVL  
PO Box 90203  
1006 BE Amsterdam  
Tel. +31 20 512 2668

NAME / FUNCTION:

DATE:

SIGNATURE:

FP1/1

Endoscopic versus percutaneous biliary drainage in resectable perihilar cholangiocarcinoma

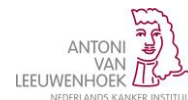

**Drainage**  
Randomization

Protocol version: 3.0 Feb 2014  
CRF version: 2.0 Jun 2014

Institute  Patient number  Patient verification code

Please return within one month after registration to: Antoni van Leeuwenhoek datacenter, Post Box 90203, 1006 BE Amsterdam

Institute

Investigator

Name caller

Patient's birth date  (dd/mm/yyyy)

Gender  (1= male, 2= female)

Date informed consent signature  (dd/mm/yyyy)

**INCLUSION CRITERIA**

|                                                                                                                                                                                                                            | <b><u>YES</u></b>        | <b><u>NO</u></b>         |
|----------------------------------------------------------------------------------------------------------------------------------------------------------------------------------------------------------------------------|--------------------------|--------------------------|
| Diagnosis or suspicion of pHCCA                                                                                                                                                                                            | <input type="checkbox"/> | <input type="checkbox"/> |
| No apparent signs of irresectability on CT scan and/or MRI, and scheduled to undergo a "curative" liver resection (may need additional lymph node biopsies or a diagnostic laparoscopy to further determine resectability) | <input type="checkbox"/> | <input type="checkbox"/> |
| Inadequate pre-operative biliary drainage defined as:                                                                                                                                                                      | <input type="checkbox"/> | <input type="checkbox"/> |
| ○ For drainage naïve patients                                                                                                                                                                                              |                          |                          |
| Serum Total Bilirubin (TB) level $\geq 50 \mu\text{mol/L}$ ;                                                                                                                                                               |                          |                          |
| ○ For drainage non-naïve patients                                                                                                                                                                                          |                          |                          |
| Persistent hyperbilirubinemia or inadequate drainage of the FRL (future remnant liver)                                                                                                                                     |                          |                          |
| Signed informed consent                                                                                                                                                                                                    | <input type="checkbox"/> | <input type="checkbox"/> |

**EXCLUSION CRITERIA**

|                                                                                                                                                                | <b><u>YES</u></b>        | <b><u>NO</u></b>         |
|----------------------------------------------------------------------------------------------------------------------------------------------------------------|--------------------------|--------------------------|
| Incomplete recovery from side-effects of any prior stenting attempt                                                                                            | <input type="checkbox"/> | <input type="checkbox"/> |
| Signs of active cholangitis, defined as leukocytes $\geq 10 \cdot 10^9/\text{L}$ or antibiotic treatment for a suspicion of cholangitis within the past 5 days | <input type="checkbox"/> | <input type="checkbox"/> |

NAME / FUNCTION:

DATE:

SIGNATURE:

**Ran1/2**

# Endoscopic versus percutaneous biliary drainage in resectable perihilar cholangiocarcinoma

## Drainage Randomization

Protocol version: 3.0 Feb 2014

CRF version: 2.0 Jun 2014

Page 2 of 2

Institute

Patient number

Patient verification code

Please return within one month after registration to: Antoni van Leeuwenhoek datacenter, Post Box 90203, 1006 BE Amsterdam

|                                        | <u>YES</u>               | <u>NO</u>                |
|----------------------------------------|--------------------------|--------------------------|
| WHO performance score $\geq 3$         | <input type="checkbox"/> | <input type="checkbox"/> |
| Any contraindication for major surgery | <input type="checkbox"/> | <input type="checkbox"/> |

|                      | <u>YES</u>               | <u>NO</u>                |
|----------------------|--------------------------|--------------------------|
| Is patient eligible? | <input type="checkbox"/> | <input type="checkbox"/> |

Date of registration (dd/mm/yyyy)

Assigned patient study number

### STRATIFICATION FACTORS

Tumor progression into the bilateral segmental bile ducts   
1= BC type I, II or III or intrahepatic CCA with involvement of the hepatic duct confluence  
2= BC type IV or intrahepatic CCA with bilateral involvement of segmental bile ducts

Drainage naivety   
1= drainage naïve  
2= prior drainage

Centrum of inclusion   
1= AMC  
2= Erasmus MC  
3= MUMC  
4= UMCG

Date of treatment allocation (dd/mm/yyyy)

Treatment arm   
1= EBD  
2= PTBD

NAME / FUNCTION:

DATE:

SIGNATURE:

Ran2/2

Endoscopic versus percutaneous biliary drainage in resectable perihilar cholangiocarcinoma:

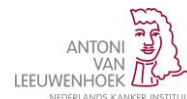

**Drainage  
Baseline**

Protocol version: 3.0 Feb 2014

CRF version: 2.0 Jun 2014

Page 1 of 4

Institute

Patient number

Patient verification code




Please return within one month after registration to: Antoni van Leeuwenhoek datacenter, Post Box 90203, 1006 BE Amsterdam

Date of baseline visit

(dd/mm/yyyy)

Date informed consent signature

(dd/mm/yyyy)

Assigned treatment arm

(1= EBD, 2= PTBD)

**DEMOGRAPHY**

Patient's birth date

(dd/mm/yyyy)

Gender

(1= male, 2= female)

**SIGNIFICANT MEDICAL HISTORY**

Is the patient suffering from, or has he/she ever suffered from significant medical conditions

(0= no, 1= yes)

(if yes, please record details below)

| Diagnosis | Year of first diagnosis | Status<br>(1= past, 2= latent, 3= active) |
|-----------|-------------------------|-------------------------------------------|
| 1.....    | <input type="text"/>    | <input type="text"/>                      |
| 2.....    | <input type="text"/>    | <input type="text"/>                      |
| 3.....    | <input type="text"/>    | <input type="text"/>                      |
| 4.....    | <input type="text"/>    | <input type="text"/>                      |

**PREVIOUS THERAPY**

Prior surgery

Did the patient undergo prior liver, pancreas or biliary/galbladder surgery?

(0=no, 1=yes)

(if yes, please record details below)

| Date procedure<br>(mm/yyyy) |
|-----------------------------|
| 1.....                      |
| 2.....                      |
| 3.....                      |

NAME / FUNCTION:

DATE:

SIGNATURE:

**BL1/4**

Endoscopic versus percutaneous biliary drainage in resectable perihilar cholangiocarcinoma:

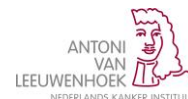

**Drainage  
Baseline**

Protocol version: 3.0 Feb 2014  
CRF version: 2.0 Jun 2014

Institute

Patient number

Patient verification code




Please return within one month after registration to: Antoni van Leeuwenhoek datacenter, Post Box 90203, 1006 BE Amsterdam

Prior drainage procedures (at local hospital)

Did the patient undergo drainage procedures before randomization? (0= no, 1= yes)

If yes, please specify

Number of drainage procedures (1-4)

Type of drainage (1= ERCP, 2= PTC, 3= both)

If ERCP, sphincterotomy performed (0= no, 1= yes)

Success of stent insertion through stenosis (0= no, 1= yes)

Were there procedure related complications (0= no, 1= yes)

If yes, specify

- 1= cholangitis
- 2= acute cholecystitis
- 3= acute pancreatitis
- 4= stent occlusion/dislocation
- 5= hemorrhage
- 6= perforation
- 7= portal vein thrombosis
- 8= other, specify .....

Sample date initial blood chemistry (i.e. prior to drainage at local hospital) (dd/mm/yyyy)

Total Bilirubin (μmol/l)

**CLINICAL ASSESSMENT**

Date assessment (dd/mm/yyyy)

Height (cm)

Weight (kg)

Approximate weight one year ago (kg)

WHO Performance status (0- 4)

**BRUSH**

Was brush performed (0= no, 1= yes)

If yes, date performed (dd/mm/yyyy)

Result brush (1= not malignant, 2= malignant)

## Drainage Baseline

Protocol version: 3.0 Feb 2014

CRF version: 2.0 Jun 2014

Page 3 of 4

Institute

Patient number

Patient verification code

Please return within one month after registration to: Antoni van Leeuwenhoek datacenter, Post Box 90203, 1006 BE Amsterdam

### PREOPERATIVE DIAGNOSTICS

Echo + Doppler performed

(0= no, 1= yes)

If yes, date performed

(dd/mm/yyyy)

Multiphasic CT scan

(0= no, 1= yes)

If yes, date performed

(dd/mm/yyyy)

MRI/MRCP performed

(0= no, 1= yes)

If yes, date performed

(dd/mm/yyyy)

### LIVER PARENCHYMA

Cirrhosis

(0= no, 1= yes)

Atrophy

(0= no, 1= left, 2= right)

### TUMOR CHARACTERISTICS

Bismuth – Corlette classification

(1= I, 2= II, 3= IIIA, 4= IIIB, 5= IV, 6= intrahepatic right, 7= intrahepatic left)

Tumor size on CT/MRI (RECIST 1.1)

(mm)

Growth pattern on CT/MRI

1= mass forming

2= intraductal

3= periductal

(1-3)

### SURGICAL PLANNING

Future remnant liver as specified by MDT meeting

Left liver segments

(0= no, 1= yes)

Right ventral segments

(0= no, 1= yes)

Right dorsal segments

(0= no, 1= yes)

### DIAGNOSTIC LAPAROSCOPY

(0= no, 1= yes)

If yes, date admittance

(dd/mm/yyyy)

Date of operation

(dd/mm/yyyy)

Date of discharge

(dd/mm/yyyy)

Result of diagnostic laparoscopy

(1= resectable, 2= irresectable)

Endoscopic versus percutaneous biliary drainage in resectable perihilar cholangiocarcinoma:



**Drainage**  
Baseline

Protocol version: 3.0 Feb 2014

CRF version: 2.0 Jun 2014

Page 4 of 4

Institute

Patient number

Patient verification code




Please return within one month after registration to: Antoni van Leeuwenhoek datacenter, Post Box 90203, 1006 BE Amsterdam

**HEMATOLOGY**

|                                | (dd/mm/yyyy)                                |                                       | (dd/mm/yyyy)                                                             |
|--------------------------------|---------------------------------------------|---------------------------------------|--------------------------------------------------------------------------|
| Sample date                    | <input type="text"/>                        |                                       | <input type="text"/>                                                     |
|                                | Value<br>(enter ND if not done)             | (specify if other than standard unit) | Value<br>(enter ND if not done)<br>(specify if other than standard unit) |
| CRP (mg/l)                     | <input type="text"/> · <input type="text"/> | .....                                 | <input type="text"/> · <input type="text"/>                              |
| Hemoglobin (mmol/l)            | <input type="text"/> · <input type="text"/> | .....                                 | <input type="text"/> · <input type="text"/>                              |
| WBC count (10 <sup>9</sup> /l) | <input type="text"/> · <input type="text"/> | .....                                 | <input type="text"/> · <input type="text"/>                              |
| ANC (10 <sup>9</sup> /l)       | <input type="text"/> · <input type="text"/> | .....                                 | <input type="text"/> · <input type="text"/>                              |
| APTT (sec)                     | <input type="text"/> · <input type="text"/> | .....                                 | <input type="text"/> · <input type="text"/>                              |
| PT-INR (sec)                   | <input type="text"/> · <input type="text"/> | .....                                 | <input type="text"/> · <input type="text"/>                              |

**CHEMISTRY**

|                                                                                                            | (dd/mm/yyyy)                                |                                       | (dd/mm/yyyy)                                                             |
|------------------------------------------------------------------------------------------------------------|---------------------------------------------|---------------------------------------|--------------------------------------------------------------------------|
| Sample date                                                                                                | <input type="text"/>                        |                                       | <input type="text"/>                                                     |
|                                                                                                            | Value<br>(enter ND if not done)             | (specify if other than standard unit) | Value<br>(enter ND if not done)<br>(specify if other than standard unit) |
| Total Bilirubin* (μmol/l)                                                                                  | <input type="text"/> · <input type="text"/> | .....                                 | <input type="text"/> · <input type="text"/>                              |
| (*must be value at randomization: this value is the reference value for evaluation of therapeutic success) |                                             |                                       |                                                                          |
| Direct Bilirubin (μmol/l)                                                                                  | <input type="text"/> · <input type="text"/> | .....                                 | <input type="text"/> · <input type="text"/>                              |
| Alk. phosphatase (U/l)                                                                                     | <input type="text"/> · <input type="text"/> | .....                                 | <input type="text"/> · <input type="text"/>                              |
| Y-GT (U/l)                                                                                                 | <input type="text"/> · <input type="text"/> | .....                                 | <input type="text"/> · <input type="text"/>                              |
| Creatinine (μmol/l)                                                                                        | <input type="text"/> · <input type="text"/> | .....                                 | <input type="text"/> · <input type="text"/>                              |
| Albumin (g/l)                                                                                              | <input type="text"/> · <input type="text"/> | .....                                 | <input type="text"/> · <input type="text"/>                              |
| Amylase (U/l)                                                                                              | <input type="text"/> · <input type="text"/> | .....                                 | <input type="text"/> · <input type="text"/>                              |

NAME / FUNCTION:

DATE:

SIGNATURE:

**BL4/4**

Endoscopic versus percutaneous biliary drainage in resectable perihilar cholangiocarcinoma:



**Drainage**

index drainage procedure = iEBD

Protocol version: 3.0 Feb 2014

CRF version: 2.0 Jun 2014

Page 1 of 2

Institute

Patient number

Patient verification code

Please return within one month after index drainage to: Antoni van Leeuwenhoek datacenter, Post Box 90203, 1006 BE Amsterdam

Date of iEBD procedure

(dd/mm/yyyy)

**PROCEDURE CHARACTERISTICS**

Standard antibiotics prophylaxis

(0= no, 1= yes)

Antibiotics given

1= 2000 mg ceftriaxone + 5 mg/kg gentamycin

2= 2000 mg ceftriaxone alone

3= 1200 mg Augmentin

8= other, specify .....

Standard post-ERCP NSAID suppository (100 mg Diclofenac)

(0= no, 1= yes)

Sphincterotomy

(0= no, 1= yes, 2= sphincterotomy performed before study)

Stent placement through stenosis successful

(0= no, 1= yes)

If no, reason

1= procedure discontinued before stent placement.

2= unable to cannulate obstruction.

8= other, specify .....

Length of procedure

(hh.mm)

Stents removed

(0= no, 1= yes)

If yes, number of stents removed

Side of stent insertion: Left

(0= no, 1= yes)

Side of stent insertion: Right ventral

(0= no, 1= yes)

Side of stent insertion: Right dorsal

(0= no, 1= yes)

Number of stents inserted

Hospitalized

(0= no, 1= yes)

If yes from

(dd/mm/yyyy)

till

(dd/mm/yyyy)



## Drainage

index drainage procedure = iEBD

Protocol version: 3.0 Feb 2014  
CRF version: 2.0 Jun 2014

Institute \_\_\_\_\_

Patient number \_\_\_\_\_

Patient verification code \_\_\_\_\_

Please return within one month after index drainage to: Antoni van Leeuwenhoek datacenter, Post Box 90203, 1006 BE Amsterdam

### ADVERSE EVENTS

Were there any drainage related complications (period: index procedure until re-drainage or explorative laparotomy) (0=no, 1=yes)

Record the worst grade that occurred according to CTC 4.0

| Adverse Event                 | Grade                    | Relation to procedure<br>(a) | SAE<br>(b)               | Adverse Event                                | Grade            | Relation to procedure<br>(a) | SAE<br>(b)               |                          |
|-------------------------------|--------------------------|------------------------------|--------------------------|----------------------------------------------|------------------|------------------------------|--------------------------|--------------------------|
| 1. Cholangitis                | <input type="checkbox"/> | <input type="checkbox"/>     | <input type="checkbox"/> | Other, <b>only use CTCAE 4.0 terminology</b> |                  |                              |                          |                          |
| 2. Acute cholecystitis        | <input type="checkbox"/> | <input type="checkbox"/>     | <input type="checkbox"/> |                                              |                  |                              |                          |                          |
| 3. Acute pancreatitis         | <input type="checkbox"/> | <input type="checkbox"/>     | <input type="checkbox"/> |                                              | 15. specify..... | <input type="checkbox"/>     | <input type="checkbox"/> | <input type="checkbox"/> |
| 4. Hemorrhage                 | <input type="checkbox"/> | <input type="checkbox"/>     | <input type="checkbox"/> |                                              | 16. specify..... | <input type="checkbox"/>     | <input type="checkbox"/> | <input type="checkbox"/> |
| Specify location.....         |                          |                              |                          |                                              | 17. specify..... | <input type="checkbox"/>     | <input type="checkbox"/> | <input type="checkbox"/> |
| 5. Perforation                | <input type="checkbox"/> | <input type="checkbox"/>     | <input type="checkbox"/> |                                              | 18. specify..... | <input type="checkbox"/>     | <input type="checkbox"/> | <input type="checkbox"/> |
| Specify location.....         |                          |                              |                          |                                              | 19. specify..... | <input type="checkbox"/>     | <input type="checkbox"/> | <input type="checkbox"/> |
| 6. Portal vein thrombosis     | <input type="checkbox"/> | <input type="checkbox"/>     | <input type="checkbox"/> |                                              | 20. specify..... | <input type="checkbox"/>     | <input type="checkbox"/> | <input type="checkbox"/> |
| 7. Dehydration                | <input type="checkbox"/> | <input type="checkbox"/>     | <input type="checkbox"/> |                                              |                  |                              |                          |                          |
| 8. Stent/catheter dysfunction | <input type="checkbox"/> | <input type="checkbox"/>     | <input type="checkbox"/> |                                              |                  |                              |                          |                          |
|                               | <b>(a)</b>               |                              | <b>(b)</b>               |                                              |                  |                              |                          |                          |
|                               | 1= unrelated             |                              | 0= no                    |                                              |                  |                              |                          |                          |
|                               | 2= unlikely              |                              | 1= yes                   |                                              |                  |                              |                          |                          |
|                               | 3= possible              |                              |                          |                                              |                  |                              |                          |                          |
|                               | 4= probable              |                              |                          |                                              |                  |                              |                          |                          |
|                               | 5= certain / definite    |                              |                          |                                              |                  |                              |                          |                          |

### INTERVENTIONS AFTER INDEX DRAINAGE PROCEDURE

Percutaneous intervention (other than PTBD) (0=no, 1=yes)

If yes, date (dd/mm/yyyy) \_\_\_\_\_

Laparotomy intervention (not including planned explorative laparotomy) (0=no, 1=yes)

If yes, date (dd/mm/yyyy) \_\_\_\_\_

ICU management (0=no, 1=yes)

If yes, date (dd/mm/yyyy) \_\_\_\_\_

Endoscopic versus percutaneous biliary drainage in resectable perihilar cholangiocarcinoma:

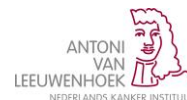

Drainage

index drainage procedure = IPTBD

Protocol version: 3.0 Feb 2014

CRF version: 2.0 Jun 2014

Institute

Patient number

Patient verification code

[Empty box for Institute]

[Empty box for Patient number]

[Empty box for Patient verification code]

Please return within one month after index drainage to: Antoni van Leeuwenhoek datacenter, Post Box 90203, 1006 BE Amsterdam

Date of IPTBD procedure

(dd/mm/yyyy) [Empty date box]

PROCEDURE CHARACTERISTICS

Standard antibiotics prophylaxis

(0= no, 1= yes) [Empty box]

Antibiotics given

1= 2000 mg ceftriaxone + 5 mg/kg gentamycin

2= 2000 mg ceftriaxone alone

3= 1200 mg Augmentin

8= other, specify.....

[Empty box]

Internal drainage through stenosis successful

(internal + external drainage)

(0= no, 1= yes) [Empty box]

If no, reason

1= procedure discontinued before stent placement.

2= unable to cannulate proximal bile ducts

3= unable to cannulate obstruction.

4= planned two-stage procedure

8= other, specify.....

[Empty box]

Length of procedure

(hh.mm) [Empty box] . [Empty box]

Side of catheter insertion: left

(0= no, 1= yes) [Empty box]

Side of catheter insertion: right ventral

(0= no, 1= yes) [Empty box]

Side of catheter insertion: right dorsal

(0= no, 1= yes) [Empty box]

Number of catheters inserted

[Empty box]

Hospitalized from

(dd/mm/yyyy) [Empty date box]

till

(dd/mm/yyyy) [Empty date box]

## Drainage

index drainage procedure = IPTBD

Protocol version: 3.0 Feb 2014

CRF version: 2.0 Jun 2014

Institute

Patient number

Patient verification code




Please return within one month after index drainage to: Antoni van Leeuwenhoek datacenter, Post Box 90203, 1006 BE Amsterdam

### ADVERSE EVENTS

Were there any drainage related complications (period: index procedure until re-drainage or explorative laparotomy) (0=no, 1=yes)

**Record the worst grade that occurred according to CTC 4.0**

| Adverse Event                 | Grade                    | Relation to procedure<br>(a) | SAE<br>(b)               | Adverse Event                                | Grade            | Relation to procedure<br>(a) | SAE<br>(b)               |                          |
|-------------------------------|--------------------------|------------------------------|--------------------------|----------------------------------------------|------------------|------------------------------|--------------------------|--------------------------|
| 1. Cholangitis                | <input type="checkbox"/> | <input type="checkbox"/>     | <input type="checkbox"/> | Other, <b>only use CTCAE 4.0 terminology</b> |                  |                              |                          |                          |
| 2. Acute cholecystitis        | <input type="checkbox"/> | <input type="checkbox"/>     | <input type="checkbox"/> |                                              |                  |                              |                          |                          |
| 3. Acute pancreatitis         | <input type="checkbox"/> | <input type="checkbox"/>     | <input type="checkbox"/> |                                              | 15. specify..... | <input type="checkbox"/>     | <input type="checkbox"/> | <input type="checkbox"/> |
| 4. Hemorrhage                 | <input type="checkbox"/> | <input type="checkbox"/>     | <input type="checkbox"/> |                                              | 16. specify..... | <input type="checkbox"/>     | <input type="checkbox"/> | <input type="checkbox"/> |
| Specify location.....         |                          |                              |                          |                                              | 17. specify..... | <input type="checkbox"/>     | <input type="checkbox"/> | <input type="checkbox"/> |
| 5. Perforation                | <input type="checkbox"/> | <input type="checkbox"/>     | <input type="checkbox"/> |                                              | 18. specify..... | <input type="checkbox"/>     | <input type="checkbox"/> | <input type="checkbox"/> |
| Specify location.....         |                          |                              |                          |                                              | 19. specify..... | <input type="checkbox"/>     | <input type="checkbox"/> | <input type="checkbox"/> |
| 6. Portal vein thrombosis     | <input type="checkbox"/> | <input type="checkbox"/>     | <input type="checkbox"/> |                                              | 20. specify..... | <input type="checkbox"/>     | <input type="checkbox"/> | <input type="checkbox"/> |
| 7. Dehydration                | <input type="checkbox"/> | <input type="checkbox"/>     | <input type="checkbox"/> |                                              |                  |                              |                          |                          |
| 8. Stent/catheter dysfunction | <input type="checkbox"/> | <input type="checkbox"/>     | <input type="checkbox"/> |                                              |                  |                              |                          |                          |

(a)  
1= unrelated  
2= unlikely  
3= possible  
4= probable  
5= certain / definite

(b)  
0= No  
1= Yes

### INTERVENTIONS AFTER INDEX DRAINAGE PROCEDURE

Percutaneous intervention (other than PTBD)

(0=no, 1=yes)

If yes, date

(dd/mm/yyyy)

Laparotomy intervention (not including planned explorative laparotomy)

(0=no, 1=yes)

If yes, date

(dd/mm/yyyy)

ICU management

(0=no, 1=yes)

If yes, date

(dd/mm/yyyy)

# Endoscopic versus percutaneous biliary drainage in resectable perihilar cholangiocarcinoma:

## Drainage

re-drainage procedure = rEBD

Protocol version: 3.0 Feb 2014

CRF version: 2.0 Jun 2014

Page 1 of 2

Institute

Patient number

Patient verification code

Please return within one month after randomization to: Antoni van Leeuwenhoek datacenter, Post Box 90203, 1006 BE Amsterdam

Date of rEBD procedure

(dd/mm/yyyy)

Indication of drainage procedure

1= technical failure of previous procedure

2= therapeutic failure previous procedure

3= cholangitis

4= stent dysfunction

5= portal vein embolisation (PVE)

8= other, specify.....

### PROCEDURE CHARACTERISTICS

Standard antibiotics prophylaxis

(0= no, 1= yes)

Antibiotic treatment cholangitis

(0= no, 1= yes)

Antibiotics given

1= 2000 mg ceftriaxone + 5 mg/kg gentamycin

2= 2000 mg ceftriaxone alone

3= 1200 mg Augmentin

8= other, specify.....

Standard post-ERCP NSAID suppository (100 mg Diclofenac)

(0= no, 1= yes)

Sphincterotomy

(0= no, 1= yes, 2= sphincterotomy performed in earlier stage)

Stent placement through stenosis successful

(0= no, 1= yes)

If no, reason

1= procedure discontinued before stent placement.

2= unable to cannulate obstruction.

8= other, specify.....

Length of procedure

(hh.mm)

Stents removed

(0= no, 1= yes)

If yes, number of stents removed

Side of stent insertion: Left

(0= no, 1= yes)

Side of stent insertion: Right ventral

(0= no, 1= yes)

Side of stent insertion: Right dorsal

(0= no, 1= yes)

Number of stents inserted

Hospitalized

(0= no, 1= yes)

If yes from

(dd/mm/yyyy)

till

(dd/mm/yyyy)

Endoscopic versus percutaneous biliary drainage in resectable perihilar cholangiocarcinoma:

**Drainage**

re-drainage procedure = rEBD

Protocol version: 3.0 Feb 2014

CRF version: 2.0 Jun 2014

Institute

Patient number

Patient verification code




Please return within one month after randomization to: Antoni van Leeuwenhoek datacenter, Post Box 90203, 1006 BE Amsterdam

Date of rEBD procedure

(dd/mm/yyyy)

**ADVERSE EVENTS**

Were there any drainage related complications (period: re-drainage untill re-drainage or explorative laparotomy) (0=no, 1=yes)   
 Record the worst grade that occurred according to CTC 4.0

| Adverse Event                 | Grade                | Relation to procedure (a) | SAE (b)              | Adverse Event                                | Grade            | Relation to procedure (a) | SAE (b)              |                      |
|-------------------------------|----------------------|---------------------------|----------------------|----------------------------------------------|------------------|---------------------------|----------------------|----------------------|
| 1. Cholangitis                | <input type="text"/> | <input type="text"/>      | <input type="text"/> | Other, <b>only use CTCAE 4.0 terminology</b> |                  |                           |                      |                      |
| 2. Acute cholecystitis        | <input type="text"/> | <input type="text"/>      | <input type="text"/> |                                              |                  |                           |                      |                      |
| 3. Acute pancreatitis         | <input type="text"/> | <input type="text"/>      | <input type="text"/> |                                              | 15. specify..... | <input type="text"/>      | <input type="text"/> | <input type="text"/> |
| 4. Hemorrhage                 | <input type="text"/> | <input type="text"/>      | <input type="text"/> |                                              | 16. specify..... | <input type="text"/>      | <input type="text"/> | <input type="text"/> |
| Specify location.....         |                      |                           |                      |                                              | 17. specify..... | <input type="text"/>      | <input type="text"/> | <input type="text"/> |
| 5. Perforation                | <input type="text"/> | <input type="text"/>      | <input type="text"/> |                                              | 18. specify..... | <input type="text"/>      | <input type="text"/> | <input type="text"/> |
| Specify location.....         |                      |                           |                      |                                              | 19. specify..... | <input type="text"/>      | <input type="text"/> | <input type="text"/> |
| 6. Portal vein thrombosis     | <input type="text"/> | <input type="text"/>      | <input type="text"/> |                                              | 20. specify..... | <input type="text"/>      | <input type="text"/> | <input type="text"/> |
| 7. Dehydration                | <input type="text"/> | <input type="text"/>      | <input type="text"/> |                                              |                  |                           |                      |                      |
| 8. Stent/catheter dysfunction | <input type="text"/> | <input type="text"/>      | <input type="text"/> |                                              |                  |                           |                      |                      |

(a) 1= unrelated  
 2= unlikely  
 3= possible  
 4= probable  
 5= certain / definite

(b) 0= No  
 1= Yes

**INTERVENTIONS AFTER RE-DRAINAGE PROCEDURE**

Percutaneous intervention (other than PTBD)

(0=no, 1=yes)

If yes, date

(dd/mm/yyyy)

Laparotomy intervention (not including planned explorative laparotomy)

(0=no, 1=yes)

If yes, date

(dd/mm/yyyy)

ICU management

(0=no, 1=yes)

If yes, date

(dd/mm/yyyy)

Endoscopic versus percutaneous biliary drainage in resectable perihilar cholangiocarcinoma:

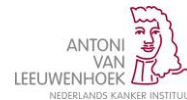

Drainage

re-drainage procedure = rPTBD

Protocol version: 3.0 Feb 2014

CRF version: 2.0 Jun 2014

Page 1 of 2

Institute

Patient number

Patient verification code

Please return within one month after randomization to: Antoni van Leeuwenhoek datacenter, Post Box 90203, 1006 BE Amsterdam

Date of rPTBD procedure

(dd/mm/yyyy)

Indication of drainage procedure

1= technical failure of previous procedure

2= therapeutic failure previous procedure

3= cholangitis

4= stent dysfunction

5= portal vein embolisation (PVE)

8= other, specify.....

PROCEDURE CHARACTERISTICS

Standard antibiotics prophylaxis

(0= no, 1= yes)

Antibiotic treatment cholangitis

(0= no, 1= yes)

Antibiotics given

1= 2000 mg ceftriaxone + 5 mg/kg gentamycin

2= 2000 mg ceftriaxone alone

3= 1200 mg Augmentin

8= other, specify.....

Internal drainage through stenosis succesfull

(0= no, 1= yes)

(internal + external drainage)

If no, reason

1= procedure discontinued before stent placement.

2= unable to cannulate proximal bile ducts

3= unable to cannulate obstruction.

4= planned two-stage procedure

8= other, specify.....

Length of procedure

(hh.mm)

Catheter replacement:

(0= no, 1= yes)

Side of catheter replacement: left

(0= no, 1= yes)

Side of catheter replacement: right ventral

(0= no, 1= yes)

Side of catheter replacement: right dorsal

(0= no, 1= yes)

New catheter insertion:

(0= no, 1= yes)

Side of new catheter insertion: left

(0= no, 1= yes)

Side of new catheter insertion: right ventral

(0= no, 1= yes)

Side of new catheter insertion: right dorsal

(0= no, 1= yes)

Total number of catheters inserted

Hospitalized from

(dd/mm/yyyy)

till

(dd/mm/yyyy)

NAME / FUNCTION:

DATE:

SIGNATURE:

rPTBD1/2

## Drainage

re-drainage procedure = rPTBD

Protocol version: 3.0 Feb 2014

CRF version: 2.0 Jun 2014

Page 2 of 2

Institute

Patient number

Patient verification code




*Please return within one month after randomization to: Antoni van Leeuwenhoek datacenter, Post Box 90203, 1006 BE Amsterdam*

Date of rPTBD procedure

(dd/mm/yyyy)

### ADVERSE EVENTS

Were there any drainage related complications (period: re-drainage untill re-drainage or resection)

(0=no, 1=yes)

**Record the worst grade that occurred according to CTC 4.0**

| Adverse Event | Grade | Relation to procedure<br>(a) | SAE<br>(b) |
|---------------|-------|------------------------------|------------|
|---------------|-------|------------------------------|------------|

| Adverse Event | Grade | Relation to procedure<br>(a) | SAE<br>(b) |
|---------------|-------|------------------------------|------------|
|---------------|-------|------------------------------|------------|

1. Cholangitis

2. Acute cholecystitis

3. Acute pancreatitis

4. Hemorrhage

Specify location.....

5. Perforation

Specify location.....

6. Portal vein thrombosis

7. Dehydration

8. Stent/catheter dysfunction

|                       |        |
|-----------------------|--------|
| (a)                   | (b)    |
| 1= unrelated          | 0= No  |
| 2= unlikely           | 1= Yes |
| 3= possible           |        |
| 4= probable           |        |
| 5= certain / definite |        |

Other, **only use CTCAE 4.0 terminology**

15. specify.....

16. specify.....

17. specify.....

18. specify.....

19. specify.....

20. specify.....

### INTERVENTIONS AFTER RE-DRAINAGE PROCEDURE

Percutaneous intervention (other than PTBD)

(0=no, 1=yes)

If yes, date

(dd/mm/yyyy)

Laparotomy intervention (not including planned explorative laparotomy)

(0=no, 1=yes)

If yes, date

(dd/mm/yyyy)

ICU management

(0=no, 1=yes)

If yes, date

(dd/mm/yyyy)

Endoscopic versus percutaneous biliary drainage in resectable perihilar cholangiocarcinoma:

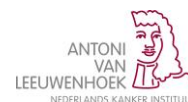

**Drainage Evaluation**

Protocol version: 3.0 Feb 2014  
CRF version: 2.0 Jun 2014

|           |                |                           |
|-----------|----------------|---------------------------|
| Institute | Patient number | Patient verification code |
|-----------|----------------|---------------------------|

Please return within one month after laparotomy to: Antoni van Leeuwenhoek datacenter, Post Box 90203, 1006 BE Amsterdam

**Evaluation of total bilirubin levels**

|                                                                      | Date<br>dd/mm/yyyy   | result<br>µmol/l     |
|----------------------------------------------------------------------|----------------------|----------------------|
| Bilirubin prior to referral (also prior to first drainage elsewhere) | <input type="text"/> | <input type="text"/> |
| Bilirubin at randomization                                           | <input type="text"/> | <input type="text"/> |
| Bilirubin 7 days after technical success                             | <input type="text"/> | <input type="text"/> |
| Bilirubin 14 days after technical success                            | <input type="text"/> | <input type="text"/> |
| Bilirubin preoperatively                                             | <input type="text"/> | <input type="text"/> |

**Evaluation of therapeutic success 7 days after technical success**

Was 7-day evaluation performed

0=no  
1=yes, after iEBD/iPTBD  
2=yes, after rEBD/rPTBD

If yes, please specify

Reduced bile ducts in segments FRL on ultrasound

(0= no, 1= yes)

Was therapeutic success achieved

(defined as: ≥ 20% decrease relative to reference bilirubin and decreased bile ducts in FRL)

(0= no, 1= yes)

Re-drainage procedures necessary

If yes, complete re-drainage procedure pages (rEBD or rPTBD)

(0= no, 1= yes)

Cross over to other drainage procedure

(0= no, 1= yes)

Number of drainage procedures done between randomization and laparotomy



Endoscopic versus percutaneous biliary drainage in resectable perihilar cholangiocarcinoma:

## Drainage

### Explorative laparotomy

Protocol version: 3.0 Feb 2014  
CRF version: 2.0 Jun 2014

Institute  Patient number  Patient verification code

Please return within one month after laparotomy to: Antoni van Leeuwenhoek datacenter, Post Box 90203, 1006 BE Amsterdam

Date index drainage procedure (dd/mm/yyyy)

Portal vein embolization (0= no, 1= yes)

Number of drainage procedures after randomization

Date of preoperative bilirubin measurement (dd/mm/yyyy)

Preoperative bilirubin (max 2 days before surgery) (μmol/l)  .

Date of explorative laparotomy (dd/mm/yyyy)

Operation date as planned (0= no, 1= yes)

If no reason of delay  
1= rescheduled for clinical reasons (patient's condition did not allow surgery)  
2= rescheduled for organizational reasons

Antibiotic prophylaxis (0= no, 1= yes)

| Details | Administration<br>1= oral<br>2= IV | daily dose<br>(mg)                        | Start date<br>(dd/mm/yyyy)                 | End date<br>(dd/mm/yyyy)                   |
|---------|------------------------------------|-------------------------------------------|--------------------------------------------|--------------------------------------------|
| 1. .... | <input type="checkbox"/>           | <input style="width: 60px;" type="text"/> | <input style="width: 150px;" type="text"/> | <input style="width: 150px;" type="text"/> |
| 2. .... | <input type="checkbox"/>           | <input style="width: 60px;" type="text"/> | <input style="width: 150px;" type="text"/> | <input style="width: 150px;" type="text"/> |
| 3. .... | <input type="checkbox"/>           | <input style="width: 60px;" type="text"/> | <input style="width: 150px;" type="text"/> | <input style="width: 150px;" type="text"/> |

Resection of the tumor performed (0= no, 1= yes)

If no, reason irresectability  
1= metastases  
2= loco regional ingrowth  
9= unknown

Palliative procedures during surgery

1= none  
2= cholecystectomy  
8= other, specify.....

If yes, type of liver resection

1= local resection  
2= local + hilus resection  
3= left sided hepatectomy, specify   
    1= 3 segments (hemihepatectomy)  
    2= 4-5 segments (extended hemihepatectomy)  
4= right sided hepatectomy, specify   
    1= 4 segments (hemihepatectomy)  
    2= 5 segments (extended hemihepatectomy)  
8= other, specify.....

Endoscopic versus percutaneous biliary drainage in resectable perihilar cholangiocarcinoma:



**Drainage**  
Explorative laparotomy

Protocol version: 3.0 Feb 2014  
CRF version: 2.0 Jun 2014

Institute  Patient number  Patient verification code

Please return within one month after laparotomy to: Antoni van Leeuwenhoek datacenter, Post Box 90203, 1006 BE Amsterdam

Segment 1 (lobus caudatus) resected (0= no, 1= yes)

**Remnant liver after resection**

Left liver segments (0= no, 1= yes)

Right ventral segments (0= no, 1= yes)

Right dorsal segments (0= no, 1= yes)

Portal vein reconstruction (0= no, 1= yes)

Number of created hepaticojejunostomies

With a transanastomotic PTBD drain

Without a transanastomotic PTBD drain

Fill out irrespective of resectability

Length of procedure (hh.mm)  .

Blood loss (ml)

Perioperative blood transfusion (packed cells)

Pringle manoeuvre (clamping of the hepatoduodenal ligament) (0= no, 1= yes)

If yes (1= continuous, 2= intermittent)

Total clamping time (min)

Endoscopic versus percutaneous biliary drainage in resectable perihilar cholangiocarcinoma:



**Drainage**  
Explorative laparotomy

Protocol version: 3.0 Feb 2014  
CRF version: 2.0 Jun 2014

Institute  Patient number  Patient verification code

Please return within one month after laparotomy to: Antoni van Leeuwenhoek datacenter, Post Box 90203, 1006 BE Amsterdam

**INTERVENTIONS AFTER LAPAROTOMY**

Percutaneous intervention (other than PTBD)

(0=no, 1=yes)

If yes, date

(dd/mm/yyyy)

Re- Laparotomy

(0=no, 1=yes)

If yes, date

(dd/mm/yyyy)

ICU management

(0=no, 1=yes)

If yes, date

(dd/mm/yyyy)

**PATHOLOGY**

Histology

(1=benigne disease, 2= malignant disease)

If malignant

Tumor differentiation grade

(1=well differentiated, 2= poor differentiated)

Histology

(1=sclerosing, 2= papillary)

Resection margins

(0= R0, 1= R1, 2= R2)

**TNM STAGING**

T

(0= T0, 1= T1, 2= T2, 3= T3, 4= T4, 5= Tis, 9= Tx)

N

0= N0, 1=N1, 2= N2, 3= N3, 9= Nx

M

(0= M0, 1= M1, 9= Mx)

# Endoscopic versus percutaneous biliary drainage in resectable perihilar cholangiocarcinoma:

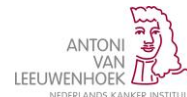

## Drainage final follow up

Protocol version: 3.0 Feb 2014

CRF version: 2.0 Jun 2014

Page 1 of 2

Institute

Patient number

Patient verification code




Please return within one month after final follow up to: Antoni van Leeuwenhoek datacenter, Post Box 90203, 1006 BE Amsterdam

Final follow up to be done 90 days after explorative laparotomy

Date follow up

(dd/mm/yyyy)

### CLINICAL ASSESSMENT

Patient status

(1= alive, 2= dead)

If "dead" (2), please specify cause of death:

1= protocol cancer

4= cardiovascular

2= second malignancy

8= other, specify.....

3= toxicity

Was patient admitted to (another) hospital for a post-operative complication

(0= no, 1= yes)

If yes, date admission

(dd/mm/yyyy)

Date discharge

(dd/mm/yyyy)

Indication for re-admission

1= recurrent disease

5= emergency relaparotomy

2= biliary leakage

6= pneumonia

3= wound infection

8= other, specify.....

4= portal vein thrombosis

### INTERVENTIONS

Endoscopic intervention

(0=no, 1=yes)

If yes, date

(dd/mm/yyyy)

Percutaneous intervention

(0=no, 1=yes)

If yes, date

(dd/mm/yyyy)

Laparotomy intervention

(0=no, 1=yes)

If yes, date

(dd/mm/yyyy)

ICU management

(0=no, 1=yes)

If yes, date

(dd/mm/yyyy)

NAME / FUNCTION:

DATE:

SIGNATURE:

FU1/2

Endoscopic versus percutaneous biliary drainage in resectable perihilar cholangiocarcinoma:



**Drainage**  
final follow up

Protocol version: 3.0 Feb 2014

CRF version: 2.0 Jun 2014

Page 2 of 2

Institute

Patient number

Patient verification code




Please return within one month after final follow up to: Antoni van Leeuwenhoek datacenter, Post Box 90203, 1006 BE Amsterdam

Final follow up to be done 90 days after explorative laparotomy

**ADVERSE EVENTS**

Were there any post-operative complications?

(0=no, 1=yes)

Record the worst grade that occurred according to CTC 4.0

| Adverse Event                            | Grade                | Relation to procedure<br>(a) | SAE<br>(b)           | Adverse Event                                | Grade                | Relation to procedure<br>(a) | SAE<br>(b)           |
|------------------------------------------|----------------------|------------------------------|----------------------|----------------------------------------------|----------------------|------------------------------|----------------------|
| 1. Cholangitis                           | <input type="text"/> | <input type="text"/>         | <input type="text"/> | 11. Wound infection                          | <input type="text"/> | <input type="text"/>         | <input type="text"/> |
| 2. Acute cholecystitis                   | <input type="text"/> | <input type="text"/>         | <input type="text"/> | 12. (emergency) (re) laparotomy              | <input type="text"/> | <input type="text"/>         | <input type="text"/> |
| 3. Acute pancreatitis                    | <input type="text"/> | <input type="text"/>         | <input type="text"/> | 13. Pneumonia                                | <input type="text"/> | <input type="text"/>         | <input type="text"/> |
| 4. Hemorrhage                            | <input type="text"/> | <input type="text"/>         | <input type="text"/> | 14. Postresectional liver failure            | <input type="text"/> | <input type="text"/>         | <input type="text"/> |
| Specify location.....                    |                      |                              |                      | Other, <b>only use CTCAE 4.0 terminology</b> |                      |                              |                      |
| 5. Perforation                           | <input type="text"/> | <input type="text"/>         | <input type="text"/> | 15. specify.....                             | <input type="text"/> | <input type="text"/>         | <input type="text"/> |
| Specify location.....                    |                      |                              |                      | 16. specify.....                             | <input type="text"/> | <input type="text"/>         | <input type="text"/> |
| 6. Portal vein thrombosis                | <input type="text"/> | <input type="text"/>         | <input type="text"/> | 17. specify.....                             | <input type="text"/> | <input type="text"/>         | <input type="text"/> |
| 7. Dehydration                           | <input type="text"/> | <input type="text"/>         | <input type="text"/> | 18. specify.....                             | <input type="text"/> | <input type="text"/>         | <input type="text"/> |
| 8. Stent dysfunction                     | <input type="text"/> | <input type="text"/>         | <input type="text"/> | 19. specify.....                             | <input type="text"/> | <input type="text"/>         | <input type="text"/> |
| 9. Hepaticojejunostomy (biliary) leakage | <input type="text"/> | <input type="text"/>         | <input type="text"/> | 20. specify.....                             | <input type="text"/> | <input type="text"/>         | <input type="text"/> |
| 10. Intra-abdominal abscess formation    | <input type="text"/> | <input type="text"/>         | <input type="text"/> |                                              |                      |                              |                      |

(a)  
1= unrelated  
2= unlikely  
3= possible  
4= probable  
5= certain / definite

(b)  
0= No  
1= Yes

Primary endpoint based on reported adverse events verified with local researcher?

(0=no, 1=yes)

**SIGNATURE INVESTIGATOR**

I certify that I have reviewed the data on this Case Report Form and that all information is complete and accurate.

Investigator's name

Investigator's signature

Date (dd/mm/yyyy)

.....

.....

NAME / FUNCTION:

DATE:

SIGNATURE:

**FU2/2**
